# Supplementary material
Source: PubMed Central journal article supplement (PMC1283787)
Supplement: plntphys_pp.105.067249_1.pdf [file plntphys_pp.105.067249_1.pdf]

**Supplemental Table 3. Comparison of transcripts in Col and Ler ecotype using full-genome oligoarrays.**

**Supplemental Table 3A. Genes expressed at higher level in Col (p-values<0.05)**

| Flower      |                            |                                                     |                                |
|-------------|----------------------------|-----------------------------------------------------|--------------------------------|
| Locus       | Normalized Ratio (Col/Ler) | Annotation                                          | Function                       |
| At1g22400-1 | 2.26                       | UDP-glucosyl transferase family protein             | carbon metabolism              |
| At2g16730   | 3.83                       | glycosyl hydrolase family protein                   | carbon metabolism              |
| At2g47030-m | 2.58                       | pectinesterase family protein                       | carbon metabolism              |
| At3g17060   | 3.58                       | pectinesterase family protein                       | carbon metabolism              |
| At3g49360   | 2.51                       | glucosamine/galactosamine family protein            | carbon metabolism              |
| At3g52600   | 3.75                       | beta-fructosidase                                   | carbon metabolism              |
| At5g15110   | 2.34                       | pectate lyase family protein                        | carbon metabolism              |
| At1g68050-m | 2.84                       | F-box family protein (FKF1)                         | cell communication             |
| At3g19310   | 2.14                       | protein kinase                                      | cell communication             |
| At5g01950   | 2.12                       | leucine-rich repeat                                 | cell communication             |
| At1g61070   | 2.19                       | plant defensin-fusion protein                       | cell defense                   |
| At4g19500   | 5.77                       | disease resistance protein                          | cell defense                   |
| At4g25780   | 2.32                       | pathogenesis-related protein                        | cell defense                   |
| At5g14380   | 2.16                       | hydroxyproline-rich glycoprotein                    | development                    |
| At1g67290   | 2.80                       | glyoxal oxidase-related                             | lipid metabolism               |
| At4g11840-m | 2.30                       | phospholipase D gamma 3 /(PLDGAMMA3)                | lipid metabolism               |
| At4g30140   | 2.43                       | GDSL-motif lipase/hydrolase                         | lipid metabolism               |
| At5g15720   | 2.12                       | GDSL-motif lipase/hydrolase                         | lipid metabolism               |
| At1g61580   | 2.54                       | 60S ribosomal protein L3 (RPL3B)                    | protein folding and processing |
| At1g65150-m | 7.25                       | mepirin and TRAF homology domain containing protein | protein folding and processing |
| At2g22970   | 2.73                       | serine carboxypeptidase S10 family protein          | protein folding and processing |
| At3g58210   | 2.73                       | mepirin and TRAF homology domain containing protein | protein folding and processing |
| At5g03330   | 2.15                       | OTU-like cysteine protease family protein           | protein folding and processing |
| At5g50680-m | 2.20                       | SUMO activating enzyme (SAE1b)                      | protein folding and processing |
| At5g59120   | 2.47                       | subtilase family protein                            | protein folding and processing |
| At1g74010   | 2.36                       | strictosidine synthase family protein               | secondary metabolism           |
| At2g29460   | 2.34                       | glutathione S-transferase                           | secondary metabolism           |
| At4g00040   | 3.64                       | chalcone and stilbene synthase                      | secondary metabolism           |
| At5g24670   | 2.15                       | cytidine/deoxycytidylate deaminase family protein   | secondary metabolism           |
| At1g15720-m | 2.18                       | myb family transcription factor                     | transcription                  |
| At1g57820   | 2.09                       | C3HC4-type RING finger family protein               | transcription                  |
| At3g07610   | 3.05                       | transcription factor jumonji (jmiC)                 | transcription                  |
| At4g02540   | 2.60                       | DC1 domain-containing protein                       | transcription                  |
| At5g01070   | 2.12                       | C3HC4-type RING finger family protein               | transcription                  |
| At5g50570-m | 2.19                       | squamosa promoter-binding protein                   | transcription                  |
| At5g65080   | 2.06                       | MADS-box family protein                             | transcription                  |
| At3g13700-m | 2.01                       | RNA-binding protein                                 | translation                    |
| At3g09530   | 2.10                       | exocyst subunit EXO70 family protein                | transport                      |
| At4g10770   | 2.37                       | oligopeptide transporter OPT family protein         | transport                      |
| At2g11240-1 | 4.23                       | non-LTR retrotransposon family protein              | transposable element           |
| At1g13670   | 2.20                       | expressed protein                                   | unknown                        |
| At1g51250   | 6.38                       | expressed protein                                   | unknown                        |
| At1g55370   | 3.15                       | expressed protein                                   | unknown                        |
| At1g67020   | 8.85                       | hypothetical protein                                | unknown                        |
| At2g02790   | 5.04                       | calmodulin-binding family protein                   | unknown                        |

|             |       |                                                         |                       |
|-------------|-------|---------------------------------------------------------|-----------------------|
| At2g14520   | 2.49  | CBS domain-containing protein                           | unknown               |
| At2g29950   | 2.02  | expressed protein                                       | unknown               |
| At2g30010   | 2.13  | expressed protein                                       | unknown               |
| At2g36550   | 2.40  | expressed protein                                       | unknown               |
| At2g40680-m | 2.59  | hypothetical protein                                    | unknown               |
| At3g58800   | 3.20  | expressed protein                                       | unknown               |
| At4g22860   | 2.46  | expressed protein                                       | unknown               |
| At5g50440   | 2.19  | Golgi SNARE protein membrin 12                          | unknown               |
| At5g64770   | 3.11  | expressed protein                                       | unknown               |
|             |       |                                                         |                       |
| <b>Leaf</b> |       |                                                         |                       |
| At3g16950   | 2.06  | dihydrolipoamide dehydrogenase                          | amino acid metabolism |
| At1g22360   | 2.12  | UDP-glucuronosyl/UDP-glucosyl transferase               | carbon metabolism     |
| At1g22400-1 | 2.79  | UDP-glucuronosyl/UDP-glucosyl transferase               | carbon metabolism     |
| At1g22650   | 5.96  | beta-fructofuranosidase                                 | carbon metabolism     |
| At2g06850   | 2.43  | xyloglucan:xyloglucosyl transferase                     | carbon metabolism     |
| At3g07010   | 2.78  | pectate lyase family protein                            | carbon metabolism     |
| At3g18270   | 2.58  | mandelate racemase/muconate lactonizing enzyme          | carbon metabolism     |
| At3g49360   | 2.55  | galactosamine-6-phosphate isomerase family protein      | carbon metabolism     |
| At3g54690   | 2.11  | sugar isomerase (SIS) domain containing protein         | carbon metabolism     |
| At4g04040-m | 2.30  | pyrophosphate-fructose-6-phosphate 1-phosphotransferase | carbon metabolism     |
| At4g23820   | 2.07  | glycoside hydrolase family protein                      | carbon metabolism     |
| At1g11350   | 2.95  | S-locus lectin protein kinase                           | cell communication    |
| At1g66940   | 2.19  | protein kinase-related                                  | cell communication    |
| At2g17220   | 2.08  | protein kinase                                          | cell communication    |
| At2g21370   | 2.00  | xylulose kinase                                         | cell communication    |
| At3g23340   | 3.15  | casein kinase                                           | cell communication    |
| At4g16970   | 5.49  | protein kinase family protein                           | cell communication    |
| At4g23160   | 6.76  | protein kinase family protein                           | cell communication    |
| At5g02760   | 3.10  | protein phosphatase 2C family protein                   | cell communication    |
| At1g02360   | 2.64  | chitinase                                               | cell defense          |
| At1g59124-m | 2.13  | disease resistance protein                              | cell defense          |
| At1g63870   | 6.09  | disease resistance protein                              | cell defense          |
| At1g66100   | 50.02 | thionin                                                 | cell defense          |
| At3g25020-m | 2.45  | disease resistance family protein                       | cell defense          |
| At3g44630   | 2.71  | disease resistance protein                              | cell defense          |
| At3g50440   | 2.13  | hydrolase alpha/beta fold                               | cell defense          |
| At4g37530   | 2.05  | peroxidase                                              | cell defense          |
| At5g36930   | 14.98 | disease resistance protein                              | cell defense          |
| At5g39190-m | 7.95  | germin-like protein (GER2)                              | cell defense          |
| At5g45490   | 14.45 | disease resistance protein                              | cell defense          |
| At5g63020   | 2.89  | disease resistance protein                              | cell defense          |
| At2g37640   | 3.00  | expansin (EXP3)                                         | cell structure        |
| At4g17030   | 4.77  | expansin-related                                        | cell structure        |
| At4g29270   | 3.52  | acid phosphatase class B family protein                 | energy metabolism     |
| At1g29420   | 4.62  | auxin-responsive family protein                         | hormone regulation    |
| At1g29450-m | 4.31  | auxin-responsive protein                                | hormone regulation    |
| At1g29460-m | 5.73  | auxin-responsive protein                                | hormone regulation    |
| At1g29490   | 3.39  | auxin-responsive family protein                         | hormone regulation    |
| At1g29500   | 3.59  | auxin-responsive protein                                | hormone regulation    |
| At3g03820-m | 3.53  | auxin-responsive protein                                | hormone regulation    |
| At3g23050   | 3.06  | auxin-responsive protein                                | hormone regulation    |
| At4g32280   | 5.18  | auxin-responsive AUX/IAA family protein                 | hormone regulation    |
| At4g34770   | 3.67  | auxin-responsive family protein                         | hormone regulation    |
| At5g18010-m | 3.67  | auxin-responsive protein                                | hormone regulation    |

|             |       |                                                     |                                |
|-------------|-------|-----------------------------------------------------|--------------------------------|
| At5g18030-m | 3.84  | auxin-responsive protein                            | hormone regulation             |
| At5g18050   | 3.28  | auxin-responsive protein                            | hormone regulation             |
| At5g18060   | 3.42  | auxin-responsive protein                            | hormone regulation             |
| At5g18080-m | 3.74  | auxin-responsive protein                            | hormone regulation             |
| At2g03980   | 3.55  | GDSL-motif lipase/hydrolase                         | lipid metabolism               |
| At2g19570   | 2.01  | cytidine deaminase (CDD)                            | nucleotide metabolism          |
| At1g31090   | 2.67  | F-box family protein                                | protein folding and processing |
| At1g52480   | 6.40  | F-box family protein                                | protein folding and processing |
| At1g68050-m | 2.63  | F-box family protein (FKF1)                         | protein folding and processing |
| At2g40920   | 13.07 | F-box family protein                                | protein folding and processing |
| At3g55170   | 2.00  | 60S ribosomal protein L35                           | protein folding and processing |
| At1g76160   | 2.11  | multi-copper oxidase type I                         | secondary metabolism           |
| At3g26210   | 2.89  | cytochrome P450 (CYP71B23)                          | secondary metabolism           |
| At4g12730   | 2.16  | fasciclin-like arabinogalactan-protein              | secondary metabolism           |
| At5g25980   | 48.74 | thiogluco-side glucohydrolase protein (TGG2)        | secondary metabolism           |
| At3g16770   | 3.06  | AP2 domain-containing protein                       | transcription                  |
| At3g24954   | 2.51  | leucine-rich repeat family protein                  | transcription                  |
| At5g45510   | 2.09  | leucine-rich repeat family protein                  | transcription                  |
| At5g65310   | 2.84  | homeobox-leucine zipper protein                     | transcription                  |
| At1g66230   | 3.15  | myb family transcription factor (MYB20)             | transcription factor           |
| At3g07200   | 2.00  | zinc finger (C3HC4-type RING finger) family protein | transcription factor           |
| At5g13080   | 2.07  | WRKY family transcription                           | transcription factor           |
| At5g65410   | 2.11  | zinc finger homeobox family protein                 | transcription factor           |
| At1g13950   | 2.37  | eukaryotic translation initiation factor            | translation                    |
| At1g58380-m | 2.16  | 40S ribosomal protein S2 (RPS2A)                    | translation                    |
| At1g52190   | 2.92  | proton-dependent oligopeptide transport (POT)       | transport                      |
| At2g11240-1 | 2.05  | non-LTR retrotransposon family protein              | transposable element           |
| At2g13970   | 2.25  | Mutator-like transposase family protein             | transposable element           |
| At1g07090   | 2.42  | expressed protein                                   | unknown                        |
| At1g31580   | 2.96  | expressed protein                                   | unknown                        |
| At1g35612   | 35.46 | expressed protein                                   | unknown                        |
| At1g56320   | 2.74  | expressed protein                                   | unknown                        |
| At1g62480   | 2.11  | vacuolar calcium-binding protein                    | unknown                        |
| At1g67020   | 22.14 | hypothetical protein                                | unknown                        |
| At1g78460   | 8.63  | SOUL heme-binding family protein                    | unknown                        |
| At2g10940   | 2.88  | protease inhibitor/seed storage/LTP                 | unknown                        |
| At2g23640   | 3.70  | reticulon family protein                            | unknown                        |
| At2g25510   | 51.08 | expressed protein                                   | unknown                        |
| At2g30010   | 4.44  | expressed protein                                   | unknown                        |
| At2g33330   | 2.21  | 33 kDa secretory protein-related                    | unknown                        |
| At3g08670   | 5.21  | expressed protein                                   | unknown                        |
| At3g19520   | 2.41  | expressed protein                                   | unknown                        |
| At3g22240   | 4.28  | expressed protein                                   | unknown                        |
| At3g25717   | 2.63  | expressed protein                                   | unknown                        |
| At3g28857   | 2.31  | expressed protein                                   | unknown                        |
| At3g47965   | 23.36 | expressed protein                                   | unknown                        |
| At3g56030   | 2.22  | pentatricopeptide (PPR) repeat-containing protein   | unknown                        |
| At3g59880   | 2.13  | expressed protein                                   | unknown                        |
| At3g60440-2 | 5.73  | expressed protein                                   | unknown                        |
| At4g01590   | 3.21  | expressed protein                                   | unknown                        |
| At4g07410   | 2.18  | transducin family protein                           | unknown                        |
| At4g07800   | 2.81  | hypothetical protein                                | unknown                        |
| At4g08110   | 16.41 | CACTA-like transposase family protein               | unknown                        |
| At5g03090   | 6.40  | hypothetical protein                                | unknown                        |
| At5g12240   | 3.04  | expressed protein                                   | unknown                        |

|             |      |                   |         |
|-------------|------|-------------------|---------|
| At5g26800   | 2.05 | expressed protein | unknown |
| At5g35800   | 4.28 | pseudogene        | unknown |
| At5g57760-m | 2.84 | expressed protein | unknown |
| At5g64870   | 3.01 | expressed protein | unknown |

**Table3B. Genes expressed at higher level in Ler (p-values<0.05)**

| Flower      |                            |                                                      |                                                |
|-------------|----------------------------|------------------------------------------------------|------------------------------------------------|
| Locus       | Normalized Ratio (Col/Ler) | Annotation                                           | Function                                       |
| At2g43100   | 0.39                       | aconitase C-terminal domain-containing protein       | amino acid metabolism                          |
| At1g51490   | 0.27                       | glycosyl hydrolase family                            | carbon metabolism                              |
| At2g20520   | 0.34                       | fasciclin-like arabinogalactan-protein (FLA6)        | carbon metabolism                              |
| At5g44400   | 0.39                       | FAD-linked oxidoreductase family                     | carbon metabolism                              |
| At5g49180   | 0.45                       | pectinesterase family protein                        | carbon metabolism                              |
| At5g53610   | 0.38                       | glycosyl hydrolase family                            | carbon metabolism                              |
| At4g01420   | 0.45                       | calcineurin B-like protein 5                         | cell communication                             |
| At1g23935   | 0.49                       | apoptosis inhibitory protein 5 (API5)                | cell defense                                   |
| At1g58520   | 0.43                       | ERD protein-related                                  | cell defense                                   |
| At1g78370   | 0.42                       | glutathione S-transferase                            | cell defense                                   |
| At4g16930-m | 0.30                       | disease resistance protein                           | cell defense                                   |
| At4g35090   | 0.39                       | catalase 2                                           | cell defense                                   |
| At3g27690   | 0.32                       | chlorophyll A-B binding protein                      | energy metabolism                              |
| At1g12010   | 0.19                       | 1-aminocyclopropane-1-carboxylate oxidase            | hormone regulation                             |
| At4g15440   | 0.25                       | hydroperoxide lyase (HPL1)/cytochrome P450 (CYP74B2) | lipid metabolism                               |
| At1g27540-m | 0.15                       | F-box family protein                                 | protein folding and processing                 |
| At1g27560   | 0.15                       | F-box family protein                                 | protein folding and processing                 |
| At1g73260   | 0.47                       | trypsin and protease inhibitor                       | protein folding and processing                 |
| At5g37640   | 0.31                       | polyubiquitin (UBQ9)                                 | protein folding and processing                 |
| At1g12350   | 0.34                       | DNA/panthothenate metabolism flavoprotein            | secondary metabolism                           |
| At4g03050   | 0.34                       | 2-oxoglutarate-dependent dioxygenase (AOP3)          | secondary metabolism (glucosinolate synthesis) |
| At4g27070   | 0.42                       | tryptophan synthase, beta subunit 2 (TSB2)           | secondary metabolism                           |
| At4g13770   | 0.21                       | cytochrome P450 (CYP83A1)                            | secondary metabolism (glucosinolate synthesis) |
| At1g73230-m | 0.40                       | nascent polypeptide-associated complex (NAC)         | transcription                                  |
| At3g61950-1 | 0.44                       | basic helix-loop-helix family protein                | transcription                                  |
| At3g61950-2 | 0.44                       | basic helix-loop-helix family protein                | transcription                                  |
| At1g32150   | 0.40                       | bZIP transcription factor                            | transcription factor                           |
| At2g25640   | 0.41                       | transcription elongation factor                      | transcription factor                           |
| At5g37280   | 0.31                       | zinc finger (C3HC4-type) family protein              | transcription factor                           |
| At3g26618   | 0.05                       | eRF1 family protein                                  | translation                                    |
| At5g24510   | 0.38                       | 60S acidic ribosomal protein                         | translation                                    |
| At2g37180   | 0.34                       | plasma membrane intrinsic protein 2C (PIP2C)         | transport                                      |
| At3g29100   | 0.39                       | vesicle transport v-SNARE 13 (VT113)                 | transport                                      |
| At4g08680-m | 0.25                       | Mutator-like transposase                             | transposable element                           |
| At1g11990   | 0.21                       | expressed protein                                    | unknown                                        |
| At1g23940   | 0.49                       | adaptin family protein                               | unknown                                        |
| At1g24370   | 0.13                       | hypothetical protein                                 | unknown                                        |
| At1g27480   | 0.42                       | lecithin:cholesterol acyltransferase family protein  | unknown                                        |
| At1g30020-m | 0.34                       | expressed protein                                    | unknown                                        |
| At1g48310-m | 0.46                       | SNF2 domain-containing protein                       | unknown                                        |
| At1g48750-m | 0.27                       | protease inhibitor/seed storage/LTP                  | unknown                                        |
| At1g50290   | 0.08                       | expressed protein                                    | unknown                                        |
| At1g52590   | 0.46                       | expressed protein                                    | unknown                                        |
| At1g58025   | 0.11                       | DNA-binding bromodomain-containing protein           | unknown                                        |

|               |      |                                                   |                         |
|---------------|------|---------------------------------------------------|-------------------------|
| At2g21140     | 0.40 | hydroxyproline-rich glycoprotein family protein   | unknown                 |
| At2g30230     | 0.22 | hypothetical protein                              | unknown                 |
| At2g35810     | 0.49 | expressed protein                                 | unknown                 |
| At2g35820     | 0.29 | expressed protein                                 | unknown                 |
| At2g40960     | 0.29 | expressed protein                                 | unknown                 |
| At2g47270     | 0.50 | expressed protein                                 | unknown                 |
| At3g18280     | 0.31 | protease inhibitor/seed storage/LTP               | unknown                 |
| At3g26510-1   | 0.42 | octicosapeptide/Phox/Bem1p                        | unknown                 |
| At3g44070     | 0.33 | expressed protein                                 | unknown                 |
| At3g49270     | 0.32 | expressed protein                                 | unknown                 |
| At4g16215     | 0.25 | expressed protein                                 | unknown                 |
| At4g24420     | 0.17 | RNA recognition motif (RRM)                       | unknown                 |
| At4g29760     | 0.27 | hypothetical protein                              | unknown                 |
| At4g32050     | 0.23 | neurochondrin family protein                      | unknown                 |
| At5g15360     | 0.37 | hypothetical protein                              | unknown                 |
| At5g17090     | 0.19 | expressed protein                                 | unknown                 |
|               |      |                                                   |                         |
| <b>Leaf</b>   |      |                                                   |                         |
| At5g23020     | 0.38 | 2-isopropylmalate synthase 2 (IMS2)               | amino acid metabolism   |
| At2g43100     | 0.31 | aconitase C-terminal domain-containing protein    | amino acid metabolism   |
| At3g19710-m   | 0.36 | branched-chain amino acid aminotransferase        | amino acid metabolism   |
| At4g23600     | 0.22 | coronatine-responsive tyrosine aminotransferase   | amino acid metabolism   |
| At3g22740     | 0.39 | homocysteine S-methyltransferase 3 (HMT-3)        | amino acid metabolism   |
| At1g44350     | 0.39 | IAA-amino acid hydrolase 6                        | amino acid metabolism   |
| At4g27070     | 0.14 | tryptophan synthase beta                          | amino acid metabolism   |
| At2g20340     | 0.34 | tyrosine decarboxylase                            | amino acid metabolism   |
| At5g14200     | 0.40 | 3-isopropylmalate dehydrogenase, chloroplast      | carbohydrate metabolism |
| At5g57655     | 0.41 | xylose isomerase family protein                   | carbohydrate metabolism |
| At3g06500     | 0.30 | beta-fructofuranosidase                           | carbon metabolism       |
| At2g28470     | 0.46 | beta-galactosidase                                | carbon metabolism       |
| At5g56870     | 0.15 | beta-galactosidase                                | carbon metabolism       |
| At2g39800     | 0.42 | delta 1-pyrroline-5-carboxylate synthetase A      | carbon metabolism       |
| At5g42800     | 0.37 | dihydroflavonol 4-reductase                       | carbon metabolism       |
| At5g50950     | 0.38 | fumarate hydratase                                | carbon metabolism       |
| At1g09420     | 0.17 | glucose-6-phosphate 1-dehydrogenase               | carbon metabolism       |
| At1g12570     | 0.19 | glucose-methanol-choline                          | carbon metabolism       |
| At2g40840     | 0.41 | glycoside hydrolase family protein                | carbon metabolism       |
| At4g23500     | 0.47 | glycoside hydrolase family protein                | carbon metabolism       |
| At1g60140     | 0.48 | glycosyl hydrolase family protein                 | carbon metabolism       |
| At1g70090     | 0.49 | glycosyl hydrolase family protein                 | carbon metabolism       |
| At2g18700     | 0.43 | glycosyl hydrolase family protein                 | carbon metabolism       |
| At3g62740-2-m | 0.35 | glycosyl hydrolase family protein                 | carbon metabolism       |
| At4g27820     | 0.22 | glycosyl hydrolase family protein                 | carbon metabolism       |
| At5g55180     | 0.21 | glycosyl hydrolase family protein                 | carbon metabolism       |
| At5g63800     | 0.45 | glycosyl hydrolase family protein                 | carbon metabolism       |
| At1g32480     | 0.29 | isocitrate/isopropylmalate                        | carbon metabolism       |
| At1g75290     | 0.46 | isoflavone reductase                              | carbon metabolism       |
| At1g75300     | 0.38 | isoflavone reductase                              | carbon metabolism       |
| At4g30270     | 0.46 | MERI-5 protein (MERI-5)                           | carbon metabolism       |
| At4g15760     | 0.49 | monooxygenase putative (MO1)                      | carbon metabolism       |
| At5g20250     | 0.31 | raffinose synthase family/seed imbibition protein | carbon metabolism       |
| At5g65140     | 0.21 | trehalose-6-phosphate phosphatase                 | carbon metabolism       |
| At2g36770     | 0.36 | UDP-glucuronosyl/UDP-glucosyl transferase         | carbon metabolism       |
| At2g36780     | 0.31 | UDP-glucuronosyl/UDP-glucosyl transferase         | carbon metabolism       |
| At2g36800     | 0.26 | UDP-glucuronosyl/UDP-glucosyl transferase         | carbon metabolism       |

|             |      |                                                        |                    |
|-------------|------|--------------------------------------------------------|--------------------|
| At4g15490   | 0.40 | UDP-glucuronosyl/UDP-glucosyl transferase              | carbon metabolism  |
| At4g30280   | 0.21 | xyloglucan:xyloglucosyl transferase                    | carbon metabolism  |
| At1g31230   | 0.45 | bifunctional aspartate kinase/homoserine dehydrogenase | cell communication |
| At4g04260   | 0.44 | bromo-adjacent homology (BAH)                          | cell communication |
| At3g20500   | 0.43 | calcineurin-like phosphoesterase                       | cell communication |
| At1g21550   | 0.16 | calcium-binding protein                                | cell communication |
| At2g33380   | 0.45 | calcium-binding RD20 protein                           | cell communication |
| At4g04740-1 | 0.25 | calcium-dependent protein                              | cell communication |
| At4g04740-2 | 0.24 | calcium-dependent protein                              | cell communication |
| At5g62570   | 0.48 | calmodulin-binding protein                             | cell communication |
| At3g50770   | 0.36 | calmodulin-related protein                             | cell communication |
| At5g42380   | 0.21 | calmodulin-related protein                             | cell communication |
| At2g30360   | 0.41 | CBL-interacting protein kinase                         | cell communication |
| At1g78830   | 0.40 | curculin-like (mannose-binding) lectin                 | cell communication |
| At1g68740-1 | 0.37 | EXS family protein / ERD1/XPR1/SYG1                    | cell communication |
| At1g68740-2 | 0.37 | EXS family protein / ERD1/XPR1/SYG2                    | cell communication |
| At4g18010-1 | 0.34 | inositol polyphosphate 5-phosphatase II (IP5PII)       | cell communication |
| At4g18010-2 | 0.34 | inositol polyphosphate 5-phosphatase II (IP5PII)       | cell communication |
| At3g02870   | 0.41 | inositol-1(or 4)-monophosphate                         | cell communication |
| At1g52000   | 0.29 | jacalin lectin family protein                          | cell communication |
| At3g16410   | 0.44 | jacalin lectin family protein                          | cell communication |
| At5g01550   | 0.34 | lectin protein kinase                                  | cell communication |
| At1g33920   | 0.35 | lectin-related                                         | cell communication |
| At1g56120   | 0.18 | leucine-rich repeat family protein                     | cell communication |
| At1g73500   | 0.43 | mitogen-activated protein                              | cell communication |
| At4g08950   | 0.43 | phosphate-responsive protein                           | cell communication |
| At5g09440   | 0.45 | phosphate-responsive protein                           | cell communication |
| At1g65250   | 0.15 | protein kinase family                                  | cell communication |
| At1g66980   | 0.24 | protein kinase family                                  | cell communication |
| At1g69790   | 0.40 | protein kinase family                                  | cell communication |
| At3g22750   | 0.40 | protein kinase family                                  | cell communication |
| At5g01920   | 0.45 | protein kinase family                                  | cell communication |
| At1g07160   | 0.30 | protein phosphatase                                    | cell communication |
| At2g30020   | 0.18 | protein phosphatase                                    | cell communication |
| At5g59220   | 0.29 | protein phosphatase                                    | cell communication |
| At1g56440   | 0.43 | serine/threonine protein phosphatase-related           | cell communication |
| At5g23570   | 0.34 | XS domain-containing protein                           | cell communication |
| At1g18300   | 0.19 | MutT/nudix family protein                              | cell cycle         |
| At1g73540   | 0.28 | MutT/nudix family protein                              | cell cycle         |
| At5g59430   | 0.41 | telomere repeat-binding protein                        | cell cycle         |
| At4g33260-m | 0.35 | WD-40 repeat family protein                            | cell cycle         |
| At1g09070   | 0.42 | C2 domain-containing protein                           | cell defense       |
| At1g70800   | 0.25 | C2 domain-containing protein                           | cell defense       |
| At3g16510   | 0.35 | C2 domain-containing protein                           | cell defense       |
| At1g30870   | 0.29 | cationic peroxidase                                    | cell defense       |
| At1g20440   | 0.27 | dehydrin (COR47)                                       | cell defense       |
| At1g20450   | 0.31 | dehydrin (ERD10)                                       | cell defense       |
| At3g50970   | 0.30 | dehydrin xero2 (XERO2/LTI30)                           | cell defense       |
| At1g19570   | 0.38 | dehydroascorbate reductase                             | cell defense       |
| At1g10920   | 0.32 | disease resistance protein                             | cell defense       |
| At1g56510   | 0.33 | disease resistance protein                             | cell defense       |
| At1g56540   | 0.16 | disease resistance protein                             | cell defense       |
| At1g72910   | 0.43 | disease resistance protein                             | cell defense       |
| At1g72950   | 0.35 | disease resistance protein                             | cell defense       |
| At2g34930   | 0.36 | disease resistance protein                             | cell defense       |

|               |      |                                                          |                        |
|---------------|------|----------------------------------------------------------|------------------------|
| At3g44480-m   | 0.19 | disease resistance protein                               | cell defense           |
| At3g44670-1   | 0.40 | disease resistance protein                               | cell defense           |
| At3g44670-2-m | 0.40 | disease resistance protein                               | cell defense           |
| At4g16890     | 0.43 | disease resistance protein                               | cell defense           |
| At4g16920-1   | 0.39 | disease resistance protein                               | cell defense           |
| At4g16930-m   | 0.18 | disease resistance protein                               | cell defense           |
| At4g16950     | 0.19 | disease resistance protein                               | cell defense           |
| At5g43740     | 0.36 | disease resistance protein                               | cell defense           |
| At5g45060     | 0.46 | disease resistance protein                               | cell defense           |
| At5g46470-2   | 0.46 | disease resistance protein                               | cell defense           |
| At1g11960     | 0.45 | early-responsive to dehydration protein-related          | cell defense           |
| At5g53730     | 0.37 | harpin-induced family protein                            | cell defense           |
| At4g11660     | 0.46 | heat shock factor protein 7 (HSF7)                       | cell defense           |
| At5g47600     | 0.16 | heat shock protein-related                               | cell defense           |
| At1g02660-1   | 0.37 | lipase class 3 family protein                            | cell defense           |
| At1g02660-2   | 0.37 | lipase class 3 family protein                            | cell defense           |
| At1g52030-1-m | 0.34 | myrosinase-binding protein                               | cell defense           |
| At1g52030-2-m | 0.34 | myrosinase-binding protein                               | cell defense           |
| At4g36010     | 0.29 | pathogenesis-related thaumatin family protein            | cell defense           |
| At2g20145-m   | 0.40 | Toll-Interleukin-Resistance(TIR)                         | cell defense           |
| At5g24780     | 0.16 | vegetative storage protein (VSP1)                        | cell defense           |
| At5g24770     | 0.14 | vegetative storage protein (VSP2)                        | cell defense           |
| At1g52080     | 0.07 | actin binding protein family                             | cell structure         |
| At5g11740     | 0.43 | arabinogalactan-protein (AGP15)                          | cell structure         |
| At2g20870     | 0.37 | cell wall protein precursor                              | cell structure         |
| At1g12350     | 0.27 | DNA/panthothenate metabolism flavoprotein family protein | cell structure         |
| At2g03090     | 0.39 | expansin (EXP15)                                         | cell structure         |
| At3g45970-m   | 0.37 | expansin family protein (EXPL1)                          | cell structure         |
| At4g18280     | 0.39 | glycine-rich cell wall protein                           | cell structure         |
| At4g30460     | 0.41 | glycine-rich protein                                     | cell structure         |
| At5g07530     | 0.22 | glycine-rich protein (GRP1)                              | cell structure         |
| At5g07550     | 0.20 | glycine-rich protein (GRP1)                              | cell structure         |
| At5g07560     | 0.27 | glycine-rich protein (GRP2)                              | cell structure         |
| At3g15400     | 0.25 | anther development protein                               | development            |
| At3g61190     | 0.15 | BON1-associated protein 1 (BAP1)                         | development            |
| At1g65480     | 0.30 | flowering locus T protein (FT)                           | development            |
| At1g76110     | 0.38 | high mobility group (HMG1)                               | development            |
| At1g01470     | 0.33 | late embryogenesis                                       | development            |
| At2g03850     | 0.31 | late embryogenesis                                       | development            |
| At1g75520     | 0.23 | lateral root primordium                                  | development            |
| At1g52890     | 0.32 | no apical meristem (NAM)                                 | development            |
| At3g29035     | 0.30 | no apical meristem (NAM)                                 | development            |
| At4g01520     | 0.49 | no apical meristem (NAM)                                 | development            |
| At4g01540     | 0.37 | no apical meristem (NAM)                                 | development            |
| At4g27410     | 0.44 | no apical meristem (NAM)                                 | development            |
| At4g08290     | 0.30 | nodulin MtN21 family protein                             | development            |
| At5g50800     | 0.27 | nodulin MtN3 family protein                              | development            |
| At2g17840     | 0.36 | senescence/dehydration-associated protein-related (ERD7) | development            |
| At1g66330     | 0.46 | senescence-associated family protein                     | development            |
| At3g22550     | 0.43 | senescence-associated protein                            | development            |
| At4g35770     | 0.35 | senescence-associated protein (SEN1)                     | development            |
| At1g75460-1   | 0.42 | ATP-dependent protease La (LON)                          | energy metabolism      |
| At2g06050     | 0.34 | 12-oxophytodienoate reductase (OPR3/DDE1)                | hormone (JA synthesis) |
| At2g44840     | 0.46 | ethylene-responsive element                              | hormone regulation     |
| At3g25780     | 0.45 | allene oxide cyclase                                     | hormone regulation     |

|             |      |                                                          |                                                     |
|-------------|------|----------------------------------------------------------|-----------------------------------------------------|
| At5g08350   | 0.20 | GRAM domain-containing protein                           | hormone regulation                                  |
| At5g13200   | 0.25 | GRAM domain-containing protein                           | hormone regulation                                  |
| At5g23360-m | 0.25 | GRAM domain-containing protein                           | hormone regulation                                  |
| At5g23370   | 0.31 | GRAM domain-containing protein                           | hormone regulation                                  |
| At4g24960   | 0.36 | ABA-responsive protein (HVA22d)                          | hormone regulation (hyperosmotic salinity response) |
| At1g02205   | 0.47 | CER1 protein                                             | lipid metabolism                                    |
| At1g75910   | 0.31 | family II extracellular lipase 4                         | lipid metabolism                                    |
| At4g15440   | 0.45 | hydroperoxide lyase (HPL1)/cytochrome P450 (CYP74B2)     | lipid metabolism                                    |
| At1g72520   | 0.38 | lipoxygenase                                             | lipid metabolism                                    |
| At3g45140   | 0.30 | lipoxygenase (LOX2)                                      | lipid metabolism                                    |
| At1g17420   | 0.40 | lipoxygenase (LOX3)                                      | lipid metabolism                                    |
| At1g54000   | 0.47 | myrosinase-associated protein                            | lipid metabolism                                    |
| At1g80950   | 0.50 | phospholipid/glycerol acyltransferase                    | lipid metabolism                                    |
| At4g22240   | 0.50 | plastid-lipid associated                                 | lipid metabolism                                    |
| At3g55290   | 0.15 | short-chain dehydrogenase/reductase (SDR) family protein | lipid metabolism                                    |
| At4g18440-m | 0.48 | adenylosuccinate lyase                                   | nucleotide metabolism                               |
| At5g67520   | 0.20 | adenylylsulfate kinase                                   | nucleotide metabolism                               |
| At3g23890   | 0.38 | ATP-hydrolyzing / DNA topoisomerase II                   | nucleotide metabolism                               |
| At4g20320   | 0.30 | CTP synthase                                             | nucleotide metabolism                               |
| At2g18190   | 0.30 | AAA-type ATPase family protein                           | protein catabolism                                  |
| At1g66180   | 0.37 | aspartyl protease family protein                         | protein folding and processing                      |
| At4g11320   | 0.36 | cysteine proteinase                                      | protein folding and processing                      |
| At2g31980   | 0.20 | cysteine proteinase inhibitor                            | protein folding and processing                      |
| At1g54290   | 0.49 | eukaryotic translation initiation factor SUI1            | protein folding and processing                      |
| At5g57870   | 0.47 | eukaryotic translation initiation factor SUI2            | protein folding and processing                      |
| At1g10110   | 0.29 | F-box family protein                                     | protein folding and processing                      |
| At1g27540-m | 0.14 | F-box family protein                                     | protein folding and processing                      |
| At1g27560   | 0.11 | F-box family protein                                     | protein folding and processing                      |
| At1g61340   | 0.42 | F-box family protein                                     | protein folding and processing                      |
| At4g27050   | 0.41 | F-box family protein                                     | protein folding and processing                      |
| At1g24140   | 0.40 | matrixin family protein                                  | protein folding and processing                      |
| At3g19170   | 0.45 | peptidase M16 family protein                             | protein folding and processing                      |
| At3g27110   | 0.32 | peptidase M48 family protein                             | protein folding and processing                      |
| At5g07460   | 0.44 | peptide methionine sulfoxide                             | protein folding and processing                      |
| At4g12910   | 0.44 | serine carboxypeptidase S10 family protein               | protein folding and processing                      |
| At4g21326   | 0.31 | subtilase family protein c                               | protein folding and processing                      |
| At5g45650   | 0.37 | subtilase family protein c                               | protein folding and processing                      |
| At5g58820   | 0.46 | subtilase family protein c                               | protein folding and processing                      |
| At5g59130   | 0.40 | subtilase family protein c                               | protein folding and processing                      |
| At2g43530   | 0.42 | trypsin inhibitor                                        | protein folding and processing                      |
| At2g16740   | 0.39 | ubiquitin-conjugating enzyme                             | protein folding and processing                      |
| At5g56150   | 0.48 | ubiquitin-conjugating enzyme                             | protein folding and processing                      |
| At5g43450   | 0.21 | 2-oxoglutarate-dependent dioxygenase                     | secondary metabolism                                |
| At5g51260   | 0.41 | acid phosphatase putative                                | secondary metabolism                                |
| At2g37770   | 0.38 | aldo/keto reductase family protein                       | secondary metabolism                                |
| At4g08870   | 0.32 | arginase                                                 | secondary metabolism                                |
| At1g58180   | 0.43 | carbonic anhydrase family protein                        | secondary metabolism                                |
| At1g62810   | 0.35 | copper amine oxidase                                     | secondary metabolism                                |
| At1g16410   | 0.42 | cytochrome P450 (CYP79F1)                                | secondary metabolism (glucosinolate synthesis)      |
| At4g13770   | 0.44 | cytochrome P450 (CYP83A1)                                | secondary metabolism (glucosinolate synthesis)      |
| At1g64940-m | 0.43 | cytochrome P450 (CYP89A6)                                | secondary metabolism                                |
| At1g69500   | 0.28 | cytochrome P450 (CYP704B1)                               | secondary metabolism                                |
| At3g48520   | 0.24 | cytochrome P450 (CYP94B3)                                | secondary metabolism                                |
| At5g26030   | 0.48 | ferrochelatase I                                         | secondary metabolism                                |
| At1g69720   | 0.38 | heme oxygenase 3 (HO3)                                   | secondary metabolism                                |



|             |      |                                                             |                                                   |
|-------------|------|-------------------------------------------------------------|---------------------------------------------------|
| At5g13800   | 0.47 | hydrolase alpha/beta fold                                   | secondary metabolism                              |
| At5g09530   | 0.21 | hydroxyproline-rich glycoprotein                            | secondary metabolism                              |
| At4g34030-1 | 0.41 | methylcrotonyl-CoA carboxylase                              | secondary metabolism                              |
| At4g34030-2 | 0.41 | methylcrotonyl-CoA carboxylase                              | secondary metabolism                              |
| At1g01290   | 0.44 | molybdopterin biosynthesis                                  | secondary metabolism                              |
| At1g21440   | 0.38 | mutase family protein                                       | secondary metabolism                              |
| At5g05600   | 0.33 | oxidoreductase 2OG-Fe(II)                                   | secondary metabolism                              |
| At1g65980   | 0.49 | peroxiredoxin type 2                                        | secondary metabolism                              |
| At3g61070   | 0.38 | peroxisomal biogenesis                                      | secondary metabolism                              |
| At3g54020   | 0.40 | phosphatidic acid phosphatase                               | secondary metabolism                              |
| At5g24240   | 0.38 | phosphatidylinositol 3- and 4-kinase                        | secondary metabolism                              |
| At2g22860   | 0.37 | phytosulfokines 2 (PSK2)                                    | secondary metabolism                              |
| At5g65870   | 0.49 | phytosulfokines 5 (PSK5)                                    | secondary metabolism                              |
| At5g24160   | 0.10 | squalene monooxygenase (SQP1,2)                             | secondary metabolism                              |
| At2g03760   | 0.18 | steroid sulfotransferase                                    | secondary metabolism                              |
| At4g32770   | 0.43 | tocopherol cyclase (VTE1/SXD1)                              | secondary metabolism                              |
| At4g03050   | 0.08 | 2-oxoglutarate-dependent dioxygenase (AOP3)                 | secondary metabolism (glucosinolate synthesis)    |
| At1g62940   | 0.31 | 4-coumarate--CoA ligase family protein                      | secondary metabolism (phenylpropanoid metabolism) |
| At5g60910   | 0.31 | agamous-like MADS box protein                               | transcription factor                              |
| At1g74930-1 | 0.13 | AP2 domain-containing transcription factor                  | transcription factor                              |
| At1g78080   | 0.45 | AP2 domain-containing transcription factor                  | transcription factor                              |
| At5g51190   | 0.34 | AP2 domain-containing transcription factor                  | transcription factor                              |
| At1g75390   | 0.36 | bZIP transcription factor                                   | transcription factor                              |
| At1g76650   | 0.26 | calcium-binding EF hand family protein                      | transcription factor                              |
| At4g27280   | 0.34 | calcium-binding EF hand family protein                      | transcription factor                              |
| At5g54490   | 0.41 | calcium-binding EF hand family protein                      | transcription factor                              |
| At3g44260   | 0.28 | CCR4-NOT transcription transcription complex protein        | transcription factor                              |
| At5g22250   | 0.26 | CCR4-NOT transcription transcription complex protein        | transcription factor                              |
| At3g02310-1 | 0.39 | developmental protein SEPALLATA2 (AGL4)                     | transcription factor                              |
| At3g02310-2 | 0.39 | developmental protein SEPALLATA2 (AGL4)                     | transcription factor                              |
| At1g12610   | 0.15 | DRE-binding protein                                         | transcription factor                              |
| At4g25470   | 0.33 | DRE-binding protein (DREB1C)                                | transcription factor                              |
| At4g25490   | 0.36 | DRE-binding protein (DREB1C)                                | transcription factor                              |
| At1g28370   | 0.11 | ERF domain protein 11 (ERF11)                               | transcription factor                              |
| At1g62360   | 0.32 | homeobox protein SHOOT MERISTEMLESS                         | transcription factor                              |
| At2g46680   | 0.35 | homeobox-leucine zipper protein                             | transcription factor                              |
| At2g45660   | 0.43 | MADS-box protein (AGL20)                                    | transcription factor                              |
| At1g74430-m | 0.18 | myb family transcription factor                             | transcription factor                              |
| At3g23250   | 0.21 | myb family transcription factor                             | transcription factor                              |
| At3g50060   | 0.31 | myb family transcription factor                             | transcription factor                              |
| At4g01060   | 0.09 | myb family transcription factor                             | transcription factor                              |
| At5g67300-m | 0.49 | myb family transcription factor                             | transcription factor                              |
| At5g59450   | 0.31 | scarecrow-like transcription factor 11 (SCL11)              | transcription factor                              |
| At3g45950   | 0.44 | splicing factor-related                                     | transcription factor                              |
| At4g37610   | 0.45 | TAZ zinc finger family protein                              | transcription factor                              |
| At5g05140   | 0.44 | transcription elongation factor                             | transcription factor                              |
| At4g10920   | 0.18 | transcriptional coactivator p15 (PC4) family protein (KELP) | transcription factor                              |
| At1g80840   | 0.23 | WRKY family transcription factor                            | transcription factor                              |
| At4g31800   | 0.38 | WRKY family transcription factor                            | transcription factor                              |
| At1g27730   | 0.21 | zinc finger (C2H2 type) family protein                      | transcription factor                              |
| At2g28200   | 0.29 | zinc finger (C2H2 type) family protein                      | transcription factor                              |
| At3g46080   | 0.34 | zinc finger (C2H2 type) family protein                      | transcription factor                              |
| At5g04340   | 0.26 | zinc finger (C2H2 type) family protein                      | transcription factor                              |
| At3g19580   | 0.30 | zinc finger (C2H2 type) protein                             | transcription factor                              |
| At1g66500   | 0.25 | zinc finger (C2H2-type) family protein                      | transcription factor                              |

|             |      |                                                      |                      |
|-------------|------|------------------------------------------------------|----------------------|
| At1g62370   | 0.28 | zinc finger (C3HC4-type RING finger) family protein  | transcription factor |
| At1g69330   | 0.43 | zinc finger (C3HC4-type RING finger) family protein  | transcription factor |
| At3g46620   | 0.48 | zinc finger (C3HC4-type RING finger) family protein  | transcription factor |
| At4g15975   | 0.30 | zinc finger (C3HC4-type RING finger) family protein  | transcription factor |
| At5g63780   | 0.45 | zinc finger (C3HC4-type RING finger) family protein  | transcription factor |
| At5g36240   | 0.06 | zinc knuckle (CCHC-type) family protein              | transcription factor |
| At5g46710   | 0.45 | zinc-binding family protein                          | transcription factor |
| At3g59140   | 0.40 | ABC transporter family protein                       | transport            |
| At5g09220   | 0.45 | amino acid permease 2 (AAP2)                         | transport            |
| At5g04770   | 0.39 | amino acid permease family protein                   | transport            |
| At3g30390   | 0.41 | amino acid transporter family protein                | transport            |
| At4g29900-1 | 0.46 | calcium-transporting ATPase                          | transport            |
| At4g29900-2 | 0.46 | calcium-transporting ATPase                          | transport            |
| At1g02300-m | 0.47 | cathepsin B-like cysteine protease                   | transport            |
| At5g49730   | 0.31 | ferric reductase-like transmembrane component family | transport            |
| At5g49740   | 0.36 | ferric reductase-like transmembrane component family | transport            |
| At2g32390   | 0.37 | glutamate receptor family                            | transport            |
| At5g16570   | 0.38 | glutamine synthetase                                 | transport            |
| At1g28480   | 0.22 | glutaredoxin family protein                          | transport            |
| At2g29420   | 0.41 | glutathione S-transferase                            | transport            |
| At2g29490   | 0.33 | glutathione S-transferase                            | transport            |
| At4g00630   | 0.48 | K <sup>+</sup> efflux antiporter                     | transport            |
| At3g51590   | 0.27 | lipid transfer protein                               | transport            |
| At5g59320   | 0.10 | lipid transfer protein 3                             | transport            |
| At5g59310   | 0.14 | lipid transfer protein 4                             | transport            |
| At2g04080   | 0.37 | MATE efflux family protein                           | transport            |
| At5g52050   | 0.26 | MATE efflux protein                                  | transport            |
| At4g24570   | 0.31 | mitochondrial substrate                              | transport            |
| At1g69850   | 0.33 | nitrate transporter (NLT1)                           | transport            |
| At1g80830   | 0.46 | NRAMP metal ion transport                            | transport            |
| At1g70300   | 0.36 | potassium transporter                                | transport            |
| At1g69870   | 0.45 | proton-dependent oligopeptide                        | transport            |
| At3g47960-m | 0.48 | proton-dependent oligopeptide                        | transport            |
| At5g62680-m | 0.47 | proton-dependent oligopeptide                        | transport            |
| At4g18210   | 0.45 | purine permease family protein                       | transport            |
| At5g56160   | 0.41 | SEC14 cytosolic factor family protein                | transport            |
| At5g07880   | 0.30 | SNAP25 homologous protein                            | transport            |
| At1g54370   | 0.30 | sodium proton exchanger                              | transport            |
| At3g05160   | 0.45 | sugar transporter                                    | transport            |
| At1g36035-m | 0.14 | copla-like retrotransposon                           | transposable element |
| At4g07840   | 0.21 | copla-like retrotransposon                           | transposable element |
| At1g35970-m | 0.25 | gypsy-like retrotransposon                           | transposable element |
| At4g08680-m | 0.03 | Mutator-like transposase family                      | transposable element |
| At2g38760   | 0.45 | annexin 3 (ANN3)                                     | unknown              |
| At2g38750   | 0.39 | annexin 4 (ANN4)                                     | unknown              |
| At2g30600-1 | 0.32 | BTB/POZ domain-containing protein                    | unknown              |
| At2g30600-2 | 0.37 | BTB/POZ domain-containing protein                    | unknown              |
| At1g52410   | 0.34 | caldesmon-related                                    | unknown              |
| At3g25990   | 0.39 | DNA-binding protein GT-1-related                     | unknown              |
| At5g02310-2 | 0.46 | eceriferum3 protein                                  | unknown              |
| At1g05340   | 0.35 | expressed protein                                    | unknown              |
| At1g10380   | 0.40 | expressed protein                                    | unknown              |
| At1g13650   | 0.30 | expressed protein                                    | unknown              |
| At1g17380   | 0.14 | expressed protein                                    | unknown              |
| At1g18740   | 0.31 | expressed protein                                    | unknown              |

|             |       |                   |         |
|-------------|-------|-------------------|---------|
| At1g19180   | 0.34  | expressed protein | unknown |
| At1g20310   | 0.16  | expressed protein | unknown |
| At1g28375   | 0.32  | expressed protein | unknown |
| At1g32920   | 0.35  | expressed protein | unknown |
| At1g35210   | 0.49  | expressed protein | unknown |
| At1g35780   | 0.34  | expressed protein | unknown |
| At1g36640   | 0.38  | expressed protein | unknown |
| At1g50290   | 0.12  | expressed protein | unknown |
| At1g52590   | 0.24  | expressed protein | unknown |
| At1g58280   | 0.48  | expressed protein | unknown |
| At1g59590   | 0.37  | expressed protein | unknown |
| At1g64360   | 0.25  | expressed protein | unknown |
| At1g64370   | 0.42  | expressed protein | unknown |
| At1g70700   | 0.41  | expressed protein | unknown |
| At1g72240   | 0.41  | expressed protein | unknown |
| At1g72450   | 0.34  | expressed protein | unknown |
| At1g74450   | 0.32  | expressed protein | unknown |
| At1g76600   | 0.40  | expressed protein | unknown |
| At2g18210   | 0.09  | expressed protein | unknown |
| At2g23120   | 0.36  | expressed protein | unknown |
| At2g25250   | 0.45  | expressed protein | unknown |
| At2g26530   | 0.48  | expressed protein | unknown |
| At2g32160   | 0.36  | expressed protein | unknown |
| At2g34600   | 0.13  | expressed protein | unknown |
| At2g40960   | 0.46  | expressed protein | unknown |
| At2g42760   | 0.37  | expressed protein | unknown |
| At2g46100   | 0.49  | expressed protein | unknown |
| At2g47270   | 0.23  | expressed protein | unknown |
| At3g02140   | 0.28  | expressed protein | unknown |
| At3g19550   | 0.33  | expressed protein | unknown |
| At3g23170   | 0.31  | expressed protein | unknown |
| At3g27210   | 0.26  | expressed protein | unknown |
| At3g52360   | 0.47  | expressed protein | unknown |
| At3g55840-m | 0.31  | expressed protein | unknown |
| At4g04200   | 0.48  | expressed protein | unknown |
| At4g13970   | 0.06  | expressed protein | unknown |
| At4g16215   | 0.07  | expressed protein | unknown |
| At4g19240   | 0.33  | expressed protein | unknown |
| At4g23880   | 0.38  | expressed protein | unknown |
| At4g29780   | 0.17  | expressed protein | unknown |
| At5g03210   | 0.28  | expressed protein | unknown |
| At5g12960   | 0.40  | expressed protein | unknown |
| At5g13220   | 0.33  | expressed protein | unknown |
| At5g17090   | -0.09 | expressed protein | unknown |
| At5g22430   | 0.22  | expressed protein | unknown |
| At5g24660   | 0.47  | expressed protein | unknown |
| At5g24740   | 0.42  | expressed protein | unknown |
| At5g43210-2 | 0.46  | expressed protein | unknown |
| At5g43680   | 0.27  | expressed protein | unknown |
| At5g46500-2 | 0.49  | expressed protein | unknown |
| At5g47860   | 0.46  | expressed protein | unknown |
| At5g48480   | 0.44  | expressed protein | unknown |
| At5g54145   | 0.39  | expressed protein | unknown |
| At5g54730   | 0.45  | expressed protein | unknown |
| At5g55570   | 0.08  | expressed protein | unknown |

|             |       |                                          |         |
|-------------|-------|------------------------------------------|---------|
| At5g59080   | 0.47  | expressed protein                        | unknown |
| At5g61340   | 0.46  | expressed protein                        | unknown |
| At5g62090   | 0.39  | expressed protein                        | unknown |
| At5g64170   | 0.48  | expressed protein                        | unknown |
| At5g65480   | 0.48  | expressed protein                        | unknown |
| At1g02990   | 0.40  | expressed protein                        | unknown |
| At1g03660   | 0.30  | expressed protein                        | unknown |
| At1g11210   | 0.25  | expressed protein                        | unknown |
| At1g26920   | 0.42  | expressed protein                        | unknown |
| At1g28400   | 0.47  | expressed protein                        | unknown |
| At1g67040   | 0.20  | expressed protein                        | unknown |
| At1g71240   | 0.33  | expressed protein                        | unknown |
| At1g73750   | 0.41  | expressed protein                        | unknown |
| At1g79245   | 0.38  | expressed protein                        | unknown |
| At2g28305   | 0.49  | expressed protein                        | unknown |
| At2g32130   | 0.44  | expressed protein                        | unknown |
| At2g41640   | 0.29  | expressed protein                        | unknown |
| At2g44500   | 0.47  | expressed protein                        | unknown |
| At3g06210   | 0.38  | expressed protein                        | unknown |
| At4g21570   | 0.39  | expressed protein                        | unknown |
| At4g24380   | 0.27  | expressed protein                        | unknown |
| At4g32020   | 0.49  | expressed protein                        | unknown |
| At4g32350   | 0.47  | expressed protein                        | unknown |
| At5g03545   | 0.26  | expressed protein                        | unknown |
| At5g43660   | 0.23  | expressed protein                        | unknown |
| At5g45630   | 0.32  | expressed protein                        | unknown |
| At5g56980   | 0.44  | expressed protein                        | unknown |
| At5g61820   | 0.34  | expressed protein                        | unknown |
| At5g65610   | 0.42  | expressed protein                        | unknown |
| At5g66650   | 0.23  | expressed protein                        | unknown |
| At3g07540   | 0.43  | formin homology 2                        | unknown |
| At1g51090   | 0.20  | heavy-metal-associated                   | unknown |
| At2g23840   | 0.46  | HNH endonuclease                         | unknown |
| At1g77960   | 0.33  | hypothetical protein                     | unknown |
| At2g11570   | 0.06  | hypothetical protein                     | unknown |
| At5g08150   | 0.46  | hypothetical protein                     | unknown |
| At5g15360   | 0.29  | hypothetical protein                     | unknown |
| At5g44570   | 0.26  | hypothetical protein                     | unknown |
| At1g24370   | 0.31  | hypothetical protein                     | unknown |
| At3g48390   | 0.33  | MA3 domain-containing protein            | unknown |
| At1g34770   | 0.23  | MAGE-8 antigen-related                   | unknown |
| At4g00780   | 0.45  | mepirin and TRAF homology                | unknown |
| At1g16860   | 0.50  | merozoite surface protein                | unknown |
| At1g07610   | 0.41  | metallothionein-like protein             | unknown |
| At2g11000   | 0.37  | natC N(alpha)-terminal acetyltransferase | unknown |
| At1g09240   | 0.14  | nicotianamine synthase                   | unknown |
| At5g56080   | 0.44  | nicotianamine synthase                   | unknown |
| At3g26510-1 | 0.35  | octicosapeptide/Phox/Bem1p               | unknown |
| At5g09620   | 0.50  | octicosapeptide/Phox/Bem1p               | unknown |
| At5g63130   | 0.42  | octicosapeptide/Phox/Bem1p               | unknown |
| At3g22470-m | 0.24  | pentatricopeptide (PPR) repeat           | unknown |
| At4g36850   | 0.39  | PQ-loop repeat family protein            | unknown |
| At1g80480   | 0.49  | PRLI-interacting factor L                | unknown |
| At1g73330   | -0.02 | protease inhibitor                       | unknown |
| At1g66850   | 0.15  | protease inhibitor/seed storage/LTP      | unknown |

|             |      |                                                                                 |         |
|-------------|------|---------------------------------------------------------------------------------|---------|
| At4g12480   | 0.31 | protease inhibitor/seed storage/LTP                                             | unknown |
| At5g62080   | 0.19 | protease inhibitor/seed storage/LTP                                             | unknown |
| At4g08596-m | 0.20 | pseudogene FAR1 -related                                                        | unknown |
| At2g29160   | 0.27 | pseudogene similar                                                              | unknown |
| At3g16810   | 0.36 | pumilio/Puf RNA-binding do                                                      | unknown |
| At4g14020   | 0.22 | rapid alkalization factor (RALF) family protein                                 | unknown |
| At4g24420   | 0.06 | RNA recognition motif (RRM)-containing protein                                  | unknown |
| At5g45160   | 0.42 | root hair defective 3 GTP-binding (RHD3) family protein                         | unknown |
| At3g58620   | 0.47 | tetratricopeptide repeat (TPR)-containing protein                               | unknown |
| At5g37130   | 0.20 | tetratricopeptide repeat (TPR)-containing protein                               | unknown |
| At3g06170   | 0.46 | TMS membrane family protein/tumor differentially expressed (TDE) family protein | unknown |
| At4g01870   | 0.34 | tolB protein-related                                                            | unknown |
| At1g66160   | 0.35 | U-box domain-containing protein                                                 | unknown |
| At2g22880-m | 0.35 | VQ motif-containing protein                                                     | unknown |
| At5g46780   | 0.44 | VQ motif-containing protein                                                     | unknown |
| At1g78070-1 | 0.42 | WD-40 repeat family protein                                                     | unknown |
| At1g78070-2 | 0.42 | WD-40 repeat family protein                                                     | unknown |
| At3g14440   | 0.39 | 9- <i>cis</i> -epoxycarotenoid dioxygenase                                      | unknown |
| At4g19170   | 0.25 | 9- <i>cis</i> -epoxycarotenoid dioxygenase                                      | unknown |
